# Supplementary material
Source: Copernicus journal article supplement (doi:10.5194/egusphere-2026-1802)
Supplement: Supplementary file 1 [file egusphere-2026-1802-supplement.pdf]

## Supplementary

Below shows the measurement results of each reference material (D664636, D664637, D664638, NPL-2892, NPL-3097, NPL3064 and NPL-2997) from each site and instrument that took part in the intercomparison exercise (Bilsdale (BSD), Ridgehill (RGL), Tacolneston (TAC), Weybourne (WAO), Heathfield (HFD) and Mace Head (MHD)). There is a separate table for each cylinder and each species. The MHD site had two CRDS instruments of the same make and model (Picarro Inc. G2401) for CO<sub>2</sub> and CH<sub>4</sub> measurements owned by the University of Galway and Laboratory for Climate and Environmental Sciences (LSCE) in France. They were given identification numbers (695 and 955 respectively) to distinguish between them. The results are the mean of the measurements collected from each instrument at each site. They are obtained using optical instrumentation (CRDS, LGR and FTIR) and GC-ECDs (denoted “ECD” in the tables below). The standard deviation is that taken of the measurements over the period they were measured and is considered the variability in the measured value.

**Table S1. Measurement results and uncertainty for CO<sub>2</sub> from D664636.**

| Site         | CO <sub>2</sub> (μmol mol <sup>-1</sup> ) | Standard deviation (μmol mol <sup>-1</sup> ) |
|--------------|-------------------------------------------|----------------------------------------------|
| BSD CRDS     | 398.06                                    | 0.01                                         |
| RGL CRDS     | 398.17                                    | 0.01                                         |
| TAC LGR      | 398.17                                    | 0.01                                         |
| WAO FTIR     | 398.02                                    | 0.05                                         |
| HFD CRDS     | 399.00                                    | 0.01                                         |
| MHD CRDS 695 | 398.14                                    | 0.01                                         |
| MHD CRDS 955 | 398.17                                    | 0.01                                         |

**Table S2. Measurement results and uncertainty for CH<sub>4</sub> from D664636.**

| Site         | CH <sub>4</sub> (nmol mol <sup>-1</sup> ) | Standard deviation (nmol mol <sup>-1</sup> ) |
|--------------|-------------------------------------------|----------------------------------------------|
| BSD CRDS     | 1837.97                                   | 0.14                                         |
| RGL CRDS     | 1838.00                                   | 0.13                                         |
| TAC LGR      | 1837.95                                   | 0.14                                         |
| WAO FTIR     | 1837.73                                   | 0.11                                         |
| HFD CRDS     | 1837.40                                   | 0.19                                         |
| MHD CRDS 695 | 1838.08                                   | 0.04                                         |
| MHD CRDS 955 | 1838.03                                   | 0.08                                         |

**Table S3. Measurement results and uncertainty for N<sub>2</sub>O from D664636.**

| Site     | N <sub>2</sub> O (nmol mol <sup>-1</sup> ) | Standard deviation (nmol mol <sup>-1</sup> ) |
|----------|--------------------------------------------|----------------------------------------------|
| BSD ECD  | 323.94                                     | 0.17                                         |
| BSD CRDS | 324.19                                     | 0.02                                         |
| RGL ECD  | 324.06                                     | 0.16                                         |
| TAC LGR  | 324.19                                     | 0.05                                         |
| WAO FTIR | 324.31                                     | 0.13                                         |
| HFD ECD  | 323.96                                     | 0.25                                         |
| HFD CRDS | 324.19                                     | 0.04                                         |
| MHD ECD  | 323.65                                     | 0.30                                         |

**Table S4. Measurement results and uncertainty for CO<sub>2</sub> from D664637.**

| Site         | CO <sub>2</sub> (μmol mol <sup>-1</sup> ) | Standard deviation (μmol mol <sup>-1</sup> ) |
|--------------|-------------------------------------------|----------------------------------------------|
| BSD CRDS     | 439.58                                    | 0.01                                         |
| RGL CRDS     | 439.67                                    | 0.01                                         |
| TAC LGR      | 439.76                                    | 0.02                                         |
| WAO FTIR     | 439.59                                    | 0.04                                         |
| HFD CRDS     | 439.67                                    | 0.01                                         |
| MHD CRDS 695 | 439.66                                    | 0.02                                         |
| MHD CRDS 955 | 439.70                                    | 0.01                                         |

**Table S5. Measurement results and uncertainty for CH<sub>4</sub> from D664637.**

| Site         | CH <sub>4</sub> (nmol mol <sup>-1</sup> ) | Standard deviation (nmol mol <sup>-1</sup> ) |
|--------------|-------------------------------------------|----------------------------------------------|
| BSD CRDS     | 2209.86                                   | 0.16                                         |
| RGL CRDS     | 2210.16                                   | 0.13                                         |
| TAC LGR      | 2210.74                                   | 0.23                                         |
| WAO FTIR     | 2209.62                                   | 0.15                                         |
| HFD CRDS     | 2210.81                                   | 0.18                                         |
| MHD CRDS 695 | 2210.01                                   | 0.07                                         |
| MHD CRDS 955 | 2209.93                                   | 0.12                                         |

**Table S6. Measurement results and uncertainty for N<sub>2</sub>O from D664637.**

| Site     | N <sub>2</sub> O (nmol mol <sup>-1</sup> ) | Standard deviation (nmol mol <sup>-1</sup> ) |
|----------|--------------------------------------------|----------------------------------------------|
| BSD ECD  | 335.46                                     | 0.18                                         |
| BSD CRDS | 335.96                                     | 0.02                                         |
| RGL ECD  | 335.78                                     | 0.14                                         |
| TAC LGR  | 335.69                                     | 0.04                                         |
| WAO FTIR | 336.14                                     | 0.13                                         |
| HFD ECD  | 335.88                                     | 0.32                                         |
| HFD CRDS | 336.08                                     | 0.06                                         |
| MHD ECD  | 335.89                                     | 0.29                                         |

**Table S7. Measurement results and uncertainty for CO<sub>2</sub> from D664638.**

| Site         | CO <sub>2</sub> (μmol mol <sup>-1</sup> ) | Standard deviation (μmol mol <sup>-1</sup> ) |
|--------------|-------------------------------------------|----------------------------------------------|
| BSD CRDS     | 502.77                                    | 0.01                                         |
| RGL CRDS     | 502.84                                    | 0.01                                         |
| TAC LGR      | 502.92                                    | 0.01                                         |
| WAO FTIR     | 502.70                                    | 0.10                                         |
| HFD CRDS     | 502.88                                    | 0.02                                         |
| MHD CRDS 695 | 502.78                                    | 0.01                                         |
| MHD CRDS 955 | 502.83                                    | 0.01                                         |

**Table S8. Measurement results and uncertainty for CH<sub>4</sub> from D664638.**

| Site         | CH <sub>4</sub> (nmol mol <sup>-1</sup> ) | Standard deviation (nmol mol <sup>-1</sup> ) |
|--------------|-------------------------------------------|----------------------------------------------|
| BSD CRDS     | 2425.56                                   | 0.18                                         |
| RGL CRDS     | 2424.86                                   | 0.17                                         |
| TAC LGR      | 2425.77                                   | 0.18                                         |
| WAO FTIR     | 2424.25                                   | 0.14                                         |
| HFD CRDS     | 2426.00                                   | 0.30                                         |
| MHD CRDS 695 | 2425.07                                   | 0.07                                         |
| MHD CRDS 955 | 2424.93                                   | 0.10                                         |

**Table S9. Measurement results and uncertainty for N<sub>2</sub>O from D664638.**

| Site     | N <sub>2</sub> O (nmol mol <sup>-1</sup> ) | Standard deviation (nmol mol <sup>-1</sup> ) |
|----------|--------------------------------------------|----------------------------------------------|
| BSD ECD  | 344.78                                     | 0.12                                         |
| BSD CRDS | 344.92                                     | 0.03                                         |
| RGL ECD  | 345.12                                     | 0.24                                         |
| TAC LGR  | 344.77                                     | 0.04                                         |
| WAO FTIR | 345.11                                     | 0.08                                         |
| HFD ECD  | 345.30                                     | 0.36                                         |
| HFD CRDS | 345.00                                     | 0.03                                         |
| MHD ECD  | 345.29                                     | 0.27                                         |

**Table S10. Measurement results and uncertainty for CO<sub>2</sub> from NPL-2892.**

| Site         | CO <sub>2</sub> (μmol mol <sup>-1</sup> ) | Standard deviation (μmol mol <sup>-1</sup> ) |
|--------------|-------------------------------------------|----------------------------------------------|
| BSD CRDS     | 384.07                                    | 0.01                                         |
| RGL CRDS     | 384.13                                    | 0.01                                         |
| TAC LGR      | 384.05                                    | 0.01                                         |
| WAO FTIR     | 383.78                                    | 0.07                                         |
| HFD CRDS     | 384.05                                    | 0.02                                         |
| MHD CRDS 695 | 384.12                                    | 0.01                                         |
| MHD CRDS 955 | 384.13                                    | 0.01                                         |

**Table S11. Measurement results and uncertainty for CH<sub>4</sub> from NPL-2892.**

| Site         | CH <sub>4</sub> (nmol mol <sup>-1</sup> ) | Standard deviation (nmol mol <sup>-1</sup> ) |
|--------------|-------------------------------------------|----------------------------------------------|
| BSD CRDS     | 1849.34                                   | 0.14                                         |
| RGL CRDS     | 1849.72                                   | 0.10                                         |
| TAC LGR      | 1849.04                                   | 0.14                                         |
| WAO FTIR     | 1849.37                                   | 0.03                                         |
| HFD CRDS     | 1849.05                                   | 0.23                                         |
| MHD CRDS 695 | 1849.77                                   | 0.07                                         |
| MHD CRDS 955 | 1849.78                                   | 0.11                                         |

**Table S12. Measurement results and uncertainty for N<sub>2</sub>O from NPL-2892.**

| Site     | N <sub>2</sub> O (nmol mol <sup>-1</sup> ) | Standard deviation (nmol mol <sup>-1</sup> ) |
|----------|--------------------------------------------|----------------------------------------------|
| BSD ECD  | 322.27                                     | 0.14                                         |
| BSD CRDS | 322.52                                     | 0.03                                         |
| RGL ECD  | 322.29                                     | 0.31                                         |
| TAC LGR  | 322.88                                     | 0.03                                         |
| WAO FTIR | 322.35                                     | 0.11                                         |
| HFD ECD  | 321.92                                     | 0.15                                         |
| HFD CRDS | 322.55                                     | 0.02                                         |
| MHD ECD  | 322.23                                     | 0.23                                         |

**Table S13. Measurement results and uncertainty for CO<sub>2</sub> from NPL-3097.**

| Site         | CO <sub>2</sub> (μmol mol <sup>-1</sup> ) | Standard deviation (μmol mol <sup>-1</sup> ) |
|--------------|-------------------------------------------|----------------------------------------------|
| BSD CRDS     | 409.67                                    | 0.01                                         |
| RGL CRDS     | 409.73                                    | 0.02                                         |
| TAC LGR      | 409.70                                    | 0.01                                         |
| WAO FTIR     | 409.42                                    | 0.06                                         |
| HFD CRDS     | 409.65                                    | 0.02                                         |
| MHD CRDS 695 | 409.70                                    | 0.01                                         |
| MHD CRDS 955 | 409.71                                    | 0.01                                         |

**Table S14. Measurement results and uncertainty for CH<sub>4</sub> from NPL-3097.**

| Site         | CH <sub>4</sub> (nmol mol <sup>-1</sup> ) | Standard deviation (nmol mol <sup>-1</sup> ) |
|--------------|-------------------------------------------|----------------------------------------------|
| BSD CRDS     | 1986.09                                   | 0.17                                         |
| RGL CRDS     | 1986.52                                   | 0.14                                         |
| TAC LGR      | 1986.19                                   | 0.18                                         |
| WAO FTIR     | 1985.97                                   | 0.22                                         |
| HFD CRDS     | 1986.49                                   | 0.22                                         |
| MHD CRDS 695 | 1986.41                                   | 0.08                                         |
| MHD CRDS 955 | 1986.43                                   | 0.07                                         |

**Table S15. Measurement results and uncertainty for N<sub>2</sub>O from NPL-3097.**

| Site     | N <sub>2</sub> O (nmol mol <sup>-1</sup> ) | Standard deviation (nmol mol <sup>-1</sup> ) |
|----------|--------------------------------------------|----------------------------------------------|
| BSD ECD  | 336.00                                     | 0.29                                         |
| BSD CRDS | 336.43                                     | 0.03                                         |
| RGL ECD  | 336.42                                     | 0.20                                         |
| TAC LGR  | 336.67                                     | 0.03                                         |
| WAO FTIR | 336.41                                     | 0.10                                         |
| HFD ECD  | 336.16                                     | 0.15                                         |
| HFD CRDS | 336.51                                     | 0.03                                         |
| MHD ECD  | 336.53                                     | 0.17                                         |

**Table S16. Measurement results and uncertainty for CO<sub>2</sub> from NPL-3064.**

| Site         | CO <sub>2</sub> (μmol mol <sup>-1</sup> ) | Standard deviation (μmol mol <sup>-1</sup> ) |
|--------------|-------------------------------------------|----------------------------------------------|
| BSD CRD      | 445.32                                    | 0.01                                         |
| RGL CRDS     | 445.35                                    | 0.01                                         |
| TAC LGR      | 445.33                                    | 0.01                                         |
| WAO FTIR     | 444.99                                    | 0.03                                         |
| HFD CRDS     | 445.28                                    | 0.01                                         |
| MHD CRDS 695 | N/A                                       | N/A                                          |
| MHD CRDS 955 | N/A                                       | N/A                                          |

**Table S17. Measurement results and uncertainty for CH<sub>4</sub> from NPL-3064.**

| Site         | CH <sub>4</sub> (nmol mol <sup>-1</sup> ) | Standard deviation (nmol mol <sup>-1</sup> ) |
|--------------|-------------------------------------------|----------------------------------------------|
| BSD CRDS     | 2254.54                                   | 0.17                                         |
| RGL CRDS     | 2254.57                                   | 0.15                                         |
| TAC LGR      | 2254.50                                   | 0.17                                         |
| WAO FTIR     | 2254.03                                   | 0.09                                         |
| HFD CRDS     | 2255.16                                   | 0.20                                         |
| MHD CRDS 695 | N/A                                       | N/A                                          |
| MHD CRDS 955 | N/A                                       | N/A                                          |

**Table S18. Measurement results and uncertainty for N<sub>2</sub>O from NPL-3064.**

| Site     | N <sub>2</sub> O (nmol mol <sup>-1</sup> ) | Standard deviation (nmol mol <sup>-1</sup> ) |
|----------|--------------------------------------------|----------------------------------------------|
| BSD ECD  | 340.89                                     | 0.24                                         |
| BSD CRDS | 340.98                                     | 0.05                                         |
| RGL ECD  | 341.21                                     | 0.15                                         |
| TAC LGR  | 340.85                                     | 0.04                                         |
| WAO FTIR | 340.89                                     | 0.04                                         |
| HFD ECD  | 340.87                                     | 0.12                                         |
| HFD CRDS | 341.08                                     | 0.03                                         |
| MHD ECD  | N/A                                        | N/A                                          |

**Table S19. Measurement results and uncertainty for CO<sub>2</sub> from NPL-2997.**

| Site         | CO <sub>2</sub> (μmol mol <sup>-1</sup> ) | Standard deviation (μmol mol <sup>-1</sup> ) |
|--------------|-------------------------------------------|----------------------------------------------|
| BSD CRD      | 480.64                                    | 0.02                                         |
| RGL CRDS     | 480.64                                    | 0.01                                         |
| TAC LGR      | 480.62                                    | 0.01                                         |
| WAO FTIR     | 480.36                                    | 0.03                                         |
| HFD CRDS     | 480.64                                    | 0.02                                         |
| MHD CRDS 695 | 480.60                                    | 0.01                                         |
| MHD CRDS 955 | 480.62                                    | 0.01                                         |

**Table S20. Measurement results and uncertainty for CH<sub>4</sub> from NPL-2997.**

| <b>Site</b>  | <b>CH<sub>4</sub> (nmol mol<sup>-1</sup>)</b> | <b>Standard deviation (nmol mol<sup>-1</sup>)</b> |
|--------------|-----------------------------------------------|---------------------------------------------------|
| BSD CRDS     | 2506.04                                       | 0.24                                              |
| RGL CRDS     | 2505.60                                       | 0.15                                              |
| TAC LGR      | 2505.74                                       | 0.20                                              |
| WAO FTIR     | 2504.98                                       | 0.10                                              |
| HFD CRDS     | 2506.60                                       | 0.24                                              |
| MHD CRDS 695 | 2505.62                                       | 0.07                                              |
| MHD CRDS 955 | 2505.57                                       | 0.09                                              |

**Table S21. Measurement results and uncertainty for N<sub>2</sub>O from NPL-2997.**

| <b>Site</b> | <b>N<sub>2</sub>O (nmol mol<sup>-1</sup>)</b> | <b>Standard deviation (nmol mol<sup>-1</sup>)</b> |
|-------------|-----------------------------------------------|---------------------------------------------------|
| BSD ECD     | 347.18                                        | 0.38                                              |
| BSD CRDS    | 347.19                                        | 0.06                                              |
| RGL ECD     | 347.53                                        | 0.22                                              |
| TAC LGR     | 347.48                                        | 0.04                                              |
| WAO FTIR    | 347.27                                        | 0.06                                              |
| HFD ECD     | 347.07                                        | 0.24                                              |
| HFD CRDS    | 347.35                                        | 0.03                                              |
| MHD ECD     | 347.86                                        | 0.28                                              |
